# Supplementary material
Source: PubMed Central journal article supplement (PMC5326585)

**Induction of alternative proinflammatory cytokines accounts for sustained psoriasiform skin inflammation in IL-17C+IL-6KO mice**

Yi Fritz<sup>1§</sup>, Philip A. Klenotic<sup>1§</sup>, William R. Swindell<sup>2,3§</sup>, ZhiQiang Yin<sup>2,4</sup>, Sarah G. Groft<sup>1</sup>, Li Zhang<sup>1</sup>, Jaymie Baliwag<sup>2</sup>, Maya I. Camhi<sup>1</sup>, Doina Diaconu<sup>1</sup>, Andrew B. Young<sup>1</sup>, Alexander M. Foster<sup>2</sup>, Andrew Johnston<sup>2</sup>, Johann E. Gudjonsson<sup>2</sup>, Thomas S. McCormick<sup>1,5</sup> and Nicole L. Ward (ORCID: 0000-0003-1907-2621)<sup>1,5\*</sup>

Department of Dermatology, Case Western Reserve University, Cleveland, Ohio, 44106, USA<sup>1</sup>

Department of Dermatology, University of Michigan, Ann Arbor, Michigan, 48109, USA<sup>2</sup>

Ohio University, Heritage College of Osteopathic Medicine, Athens, Ohio, 45701, USA<sup>3</sup>

Department of Dermatology, the First Affiliated Hospital of Nanjing Medical University, Nanjing, Jiangsu, China<sup>4</sup>

Murdough Family Center of Psoriasis, Cleveland, Ohio, 44106, USA<sup>5</sup>

§ Contributed equally to this work.

**Condensed title:** Compensation for IL-6 in psoriasis.

**\*Address for correspondence:**

Dr. Nicole L. Ward  
Case Western Reserve University  
Department of Dermatology  
BRB519, 10900 Euclid Ave,  
Cleveland, OH 44106  
216-368-1111 office phone  
216-368-0212 fax  
[nlw4@cwru.edu](mailto:nlw4@cwru.edu)

## Supplemental Figures

**Figure S1. Uninvolved skin from 10-week old IL-17C+KO mice has decreased cutaneous inflammatory immune cell infiltrate compared to age matched IL-17C+ mice. This difference is abrogated by 14-weeks of age.** Representative images of uninvolved skin of 10 and 14 week old IL-17C+ and IL-17C+KO mice demonstrating a reduction (or delay) in the number of skin infiltrating immune cells in IL-17C+KO mice at 10-weeks of age which is abrogated at 14 weeks. Scale bar = 100µm.

**Figure S2. KC-Tie2 psoriasiform mice have elevated cutaneous expression of *Il17c*, *Tnf* and *Il6*; introduction of additional exogenous IL-6 or TNFα elicits further inflammatory gene response in the skin of KC-Tie2 x IL-6KO mice.** (a) qRT-PCR analyses of *Il17c*, *Tnf* and *Il6* transcripts in the KC-Tie2 transgenic mouse model of psoriasis (n=6 each). (b) KC-Tie2xIL-6KO mice injected with intradermal recombinant IL-6 or TNFα develop increased epidermal thickness (acanthosis; µm), a surrogate measure of inflammation. Each line represents an individual mouse. \*P<0.05.

**Figure S3. IL-17C, IL-6 and TNFα elicit additive and synergistic production of keratinocyte-derived proinflammatory transcripts.** Primary wildtype mouse keratinocytes were stimulated for 8 hours with 10ng/ml of IL-17C, IL-6, TNFα alone or in combination, and harvested for transcript analyses using qRT-PCR. IL-17C-IL-6-TNFα together induce the highest levels of many of the candidate transcripts measured, including *Il17c*, *Tnf*, *Il36α/β/γ*, *Defb3* and *S100a8/a9*. (n= 3/group performed in triplicate). Line between groups indicates P<0.05.

**Figure S4. IL-17C, IL-6 and TNF $\alpha$  elicit additive and synergistic production of keratinocyte-derived proinflammatory transcripts.** (a) Primary adult human keratinocytes were stimulated for 24 or 48 hours with recombinant human IL-17C (100 ng/ml), TNF $\alpha$  (20 ng/ml) and IL-6 (20 ng/ml) alone or in combination, and harvested for transcript analyses using qRT-PCR. IL-17C-IL-6-TNF $\alpha$  together induce the highest levels of many of the candidate transcripts we measured, including *IL17C*, *TNF*, *IL36RA/B*, *DEFB4A*, *IL8*, *CCL20*, and *SI00A8/A9*. (n= 3/group performed in triplicate). (b) Statistics table comparing differences between groups.

**Figure S5. Heat map analyses of uninvolved skin comparing changes in 14-week old IL-17C+KO and IL-17C+ mice.** Heat map of transcripts that change between uninvolved skin comparing IL-17C+ vs. controls at 14-weeks of age and IL-17C+KO vs. controls at 14-weeks of age (n=4/5/group). IL-17C+KO vs. IL-17C+ mice were then compared with each other to identify key up- and down-regulated transcripts altered in IL-17C+KO mice.

**Figure S6. Heat map analyses of uninvolved skin comparing changes in IL-17C+KO mice between 10- and 14-weeks of age.** Heat map of gene transcripts that change between uninvolved skin of IL-17C+KO vs. control mice at 10-weeks of age and IL-17C+KO vs. control mice at 14-weeks of age (n=4/5/group) and then 10-week vs. 14-week transcript changes in IL-17C+KO were evaluated.

**Figure S7. Heat map analyses of involved skin comparing changes in IL-17C+ and IL-17C+KO at 14-weeks of age.** Heat map of gene transcripts that change between involved skin comparing IL-17C+ vs. controls at 14-weeks of age and IL-17C+KO vs. controls at 14-weeks of age (n=4/5/group). IL-17C+KO vs. IL-17C+ were then compared with each other to identify key up- and down-regulated transcripts altered in IL-17C+KO mice at 14-weeks of age.

**Figure S8. Exogenous introduction of TNF $\alpha$  and IL-6 into control mouse skin and IL-17C+ uninvolved mouse skin promotes a preferential proinflammatory response in IL-17C+ mice.** (a) Epidermal thickness measures (acanthosis;  $\mu\text{m}$ ) following intradermal injections of either BSA or recombinant TNF $\alpha$  and IL-6 (500ng of each), every other day for 16 days. (b) Representative images from C57Bl/6 mouse skin and IL-17C+ uninvolved skin injected with either BSA or TNF $\alpha$ /IL-6 immunostained using antibodies specific to CD4 demonstrates increases in skin-infiltrating CD4<sup>+</sup> T cells following cytokine injections. Quantification of skin-infiltrating CD4<sup>+</sup> (c) and F4/80<sup>+</sup> (d) cells (mean number of cells/field of view) in BSA and TNF $\alpha$ /IL-6 injected control mouse skin (n=6-8) and uninvolved IL-17C+ skin (n=7). \*P<0.05 vs. control +BSA; \*\* P<0.05 vs. IL-17C+BSA. Scale bar in b = 100 $\mu\text{m}$ .

Figure S1

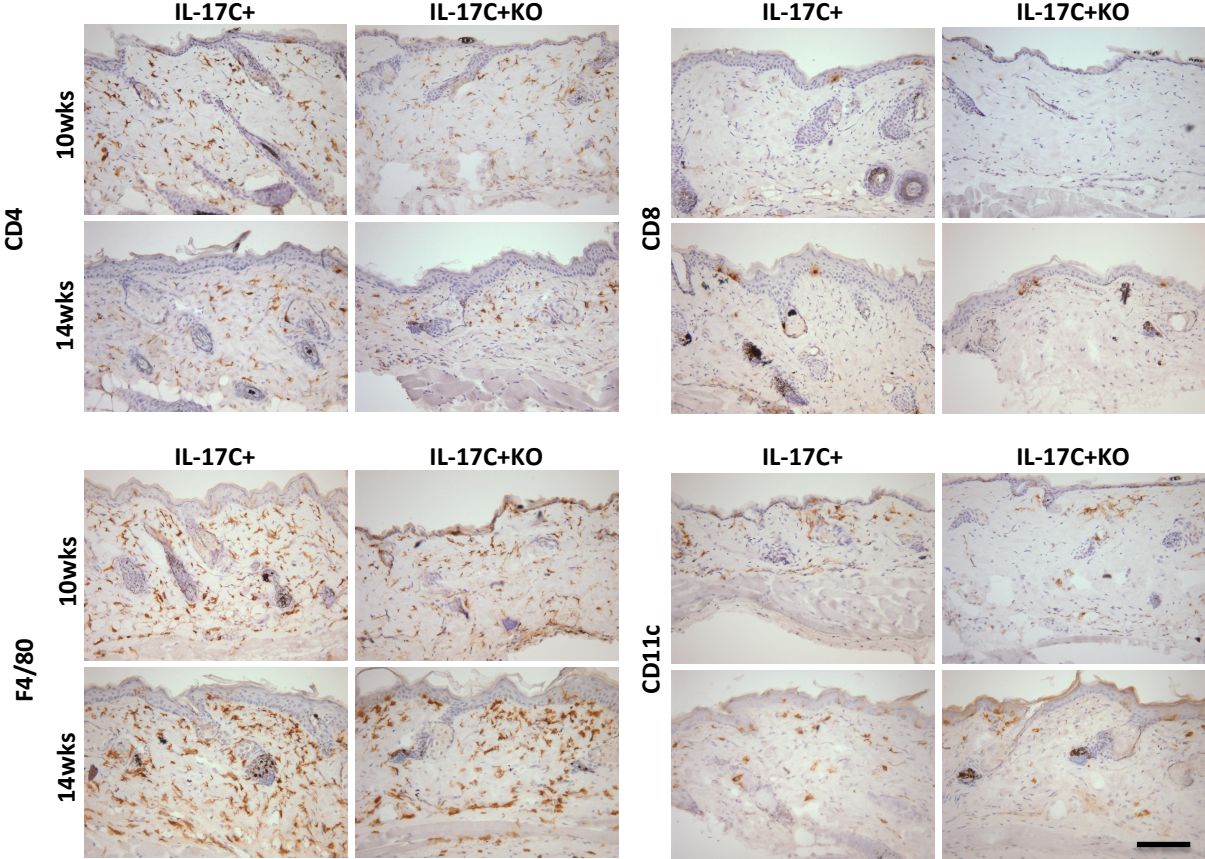

Figure S2

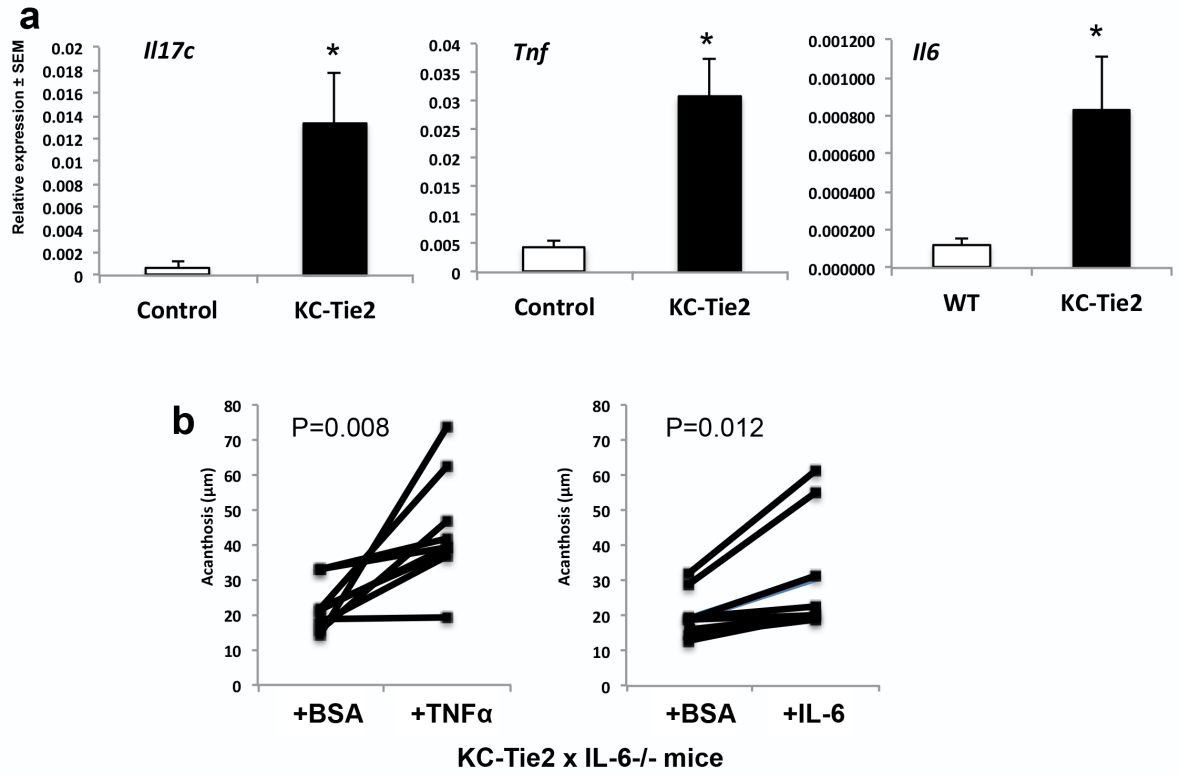

## Mouse primary keratinocytes

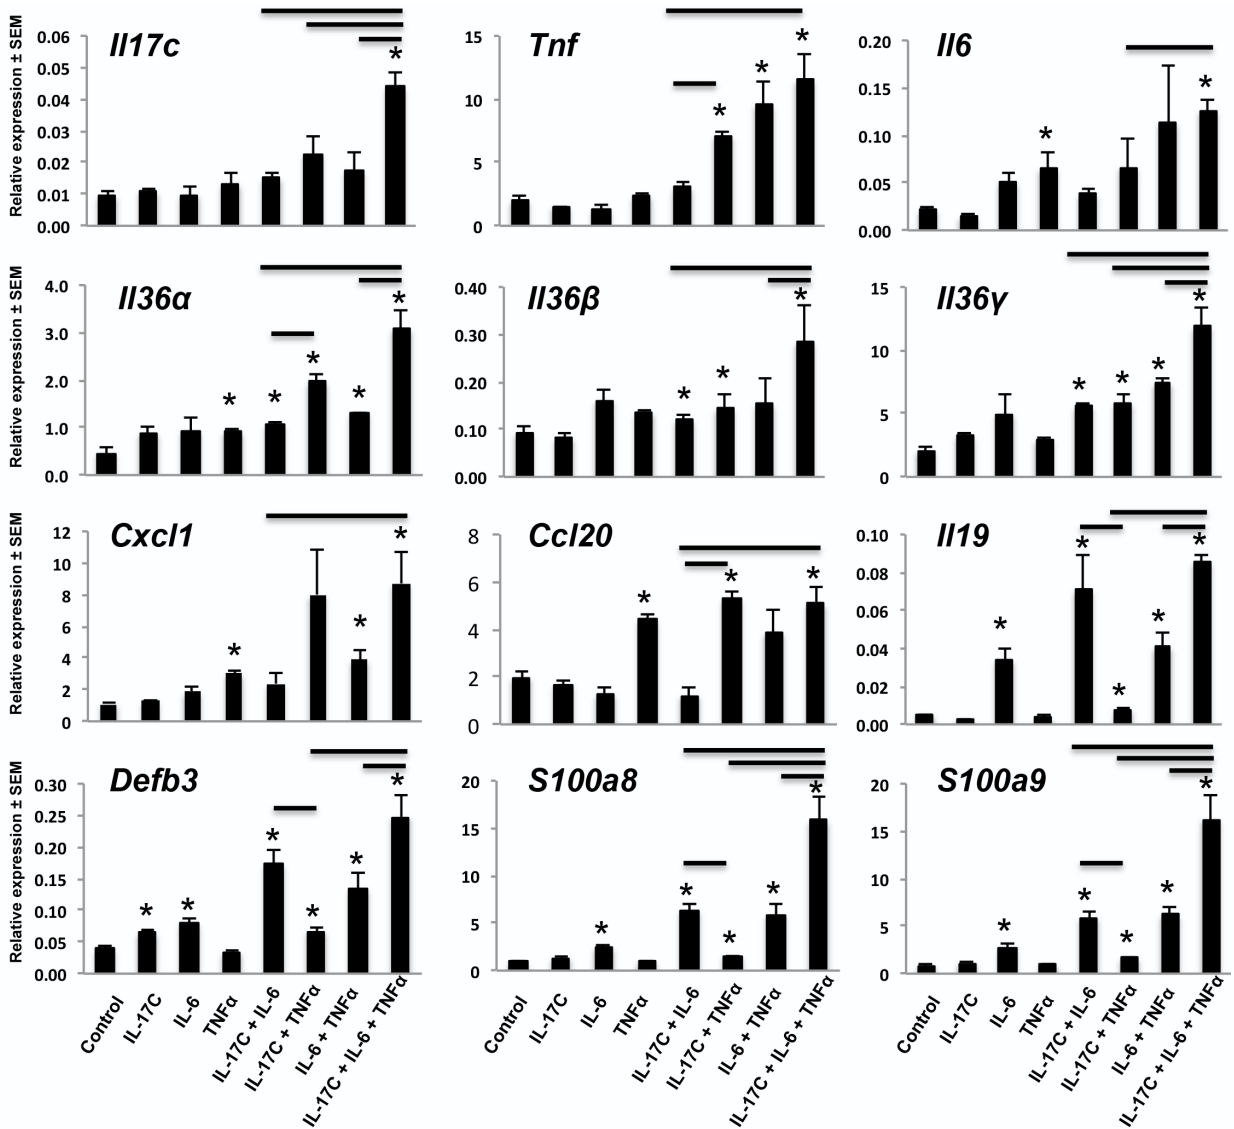





**b****Statistics on all primary human KC stimulation qRT-PCR data.**

| IL-17C          | Control    |            | IL-17C     |            | IL-6       |            | TNF        |            | IL-17C + IL-6 |            | IL-17C + TNF |            | IL-6 + TNF |            | IL-17C+IL-6+TNF |     |
|-----------------|------------|------------|------------|------------|------------|------------|------------|------------|---------------|------------|--------------|------------|------------|------------|-----------------|-----|
|                 | 24h        | 48h        | 24h        | 48h        | 24h        | 48h        | 24h        | 48h        | 24h           | 48h        | 24h          | 48h        | 24h        | 48h        | 24h             | 48h |
| Control         | 1          | 1          |            |            |            |            |            |            |               |            |              |            |            |            |                 |     |
| IL-17C          | 0.54957477 | 0.01346675 | 1          | 1          |            |            |            |            |               |            |              |            |            |            |                 |     |
| IL-6            | 0.09899463 | 0.00302248 | 0.22296357 | 0.27533358 | 1          | 1          |            |            |               |            |              |            |            |            |                 |     |
| TNF             | 1.6248E-05 | 0.03962814 | 4.4503E-05 | 0.57472178 | 0.00115601 | 0.13079114 |            |            |               |            |              |            |            |            |                 |     |
| IL-17C + IL-6   | 0.00328966 | 0.00394579 | 0.01042568 | 0.02454939 | 0.16761083 | 0.10075759 | 0.01079592 | 0.02363376 | 1             | 1          |              |            |            |            |                 |     |
| IL-17C + TNF    | 0.00116612 | 0.17925261 | 0.00096301 | 0.07827843 | 0.00504688 | 0.01107839 | 0.43098627 | 0.23041535 | 0.02329788    | 0.00457519 |              |            |            |            |                 |     |
| IL-6 + TNF      | 0.00010512 | 0.00073728 | 8.7804E-05 | 0.01211396 | 0.00064378 | 0.07825103 | 0.12497846 | 0.00962286 | 0.00315037    | 0.68979319 | 0.63255903   | 0.00102855 | 1          | 1          |                 |     |
| IL-17C+IL-6+TNF | 0.00060387 | 0.00171252 | 0.00025858 | 0.14049559 | 0.00048331 | 0.68054493 | 0.00365527 | 0.06828783 | 0.00092723    | 0.11858759 | 0.0099824    | 0.00535566 | 0.01314705 | 0.11578702 | 1               | 1   |

| TNFalpha        | Control    |            | IL-17C     |            | IL-6       |            | TNF        |            | IL-17C + IL-6 |            | IL-17C + TNF |            | IL-6 + TNF |            | IL-17C+IL-6+TNF |     |
|-----------------|------------|------------|------------|------------|------------|------------|------------|------------|---------------|------------|--------------|------------|------------|------------|-----------------|-----|
|                 | 24h        | 48h        | 24h        | 48h        | 24h        | 48h        | 24h        | 48h        | 24h           | 48h        | 24h          | 48h        | 24h        | 48h        | 24h             | 48h |
| Control         | 1          | 1          |            |            |            |            |            |            |               |            |              |            |            |            |                 |     |
| IL-17C          | 0.8884317  | 0.26191838 | 1          | 1          |            |            |            |            |               |            |              |            |            |            |                 |     |
| IL-6            | 0.06551695 | 0.03146449 | 0.05351874 | 0.08957311 | 1          | 1          |            |            |               |            |              |            |            |            |                 |     |
| TNF             | 0.00546865 | 0.00679037 | 0.00541316 | 0.00765676 | 0.00821399 | 0.01184477 | 1          | 1          |               |            |              |            |            |            |                 |     |
| IL-17C + IL-6   | 0.00702554 | 0.09315023 | 0.00402251 | 0.14458751 | 0.80271664 | 0.53870671 | 0.00853016 | 0.01841924 | 1             | 1          |              |            |            |            |                 |     |
| IL-17C + TNF    | 0.00781434 | 0.01620771 | 0.00777282 | 0.01800819 | 0.00984063 | 0.02621092 | 0.29716839 | 0.9658818  | 0.01010291    | 0.03737025 | 1            | 1          |            |            |                 |     |
| IL-6 + TNF      | 0.01182994 | 0.00700172 | 0.01178997 | 0.00573664 | 0.01378042 | 0.00979605 | 0.14194893 | 0.30151984 | 0.01404516    | 0.01253621 | 0.48945327   | 0.30707513 | 1          | 1          |                 |     |
| IL-17C+IL-6+TNF | 0.01206693 | 0.02245575 | 0.01201887 | 0.02359205 | 0.0144176  | 0.02802635 | 0.20721987 | 0.2543617  | 0.01473395    | 0.03250129 | 0.70386945   | 0.25548001 | 0.74776571 | 0.70993314 | 1               | 1   |

| IL-6            | Control    |            | IL-17C     |            | IL-6       |            | TNF        |            | IL-17C + IL-6 |            | IL-17C + TNF |            | IL-6 + TNF |            | IL-17C+IL-6+TNF |     |
|-----------------|------------|------------|------------|------------|------------|------------|------------|------------|---------------|------------|--------------|------------|------------|------------|-----------------|-----|
|                 | 24h        | 48h        | 24h        | 48h        | 24h        | 48h        | 24h        | 48h        | 24h           | 48h        | 24h          | 48h        | 24h        | 48h        | 24h             | 48h |
| Control         | 1          | 1          |            |            |            |            |            |            |               |            |              |            |            |            |                 |     |
| IL-17C          | 0.33526075 | 0.20920827 | 1          | 1          |            |            |            |            |               |            |              |            |            |            |                 |     |
| IL-6            | 0.23926214 | 0.55251441 | 0.82350954 | 0.43535766 | 1          | 1          |            |            |               |            |              |            |            |            |                 |     |
| TNF             | 0.04443248 | 0.12561883 | 0.15549857 | 0.10977222 | 0.09948135 | 0.11681544 | 1          | 1          |               |            |              |            |            |            |                 |     |
| IL-17C + IL-6   | 0.22744316 | 0.17967056 | 0.72401136 | 0.11231748 | 0.85084221 | 0.14018133 | 0.08362324 | 0.26266123 | 1             | 1          |              |            |            |            |                 |     |
| IL-17C + TNF    | 0.01758375 | 0.03625938 | 0.03808071 | 0.02137316 | 0.02861857 | 0.02735116 | 0.23241673 | 0.39390327 | 0.02581809    | 0.48439638 | 1            | 1          |            |            |                 |     |
| IL-6 + TNF      | 0.04170131 | 0.06343896 | 0.08094664 | 0.04274082 | 0.0645339  | 0.3704117  | 0.43781718 | 0.05918486 | 0.4595384     | 0.83122105 | 0.89622089   | 1          | 1          |            |                 |     |
| IL-17C+IL-6+TNF | 0.00592669 | 0.02657148 | 0.01906988 | 0.01791756 | 0.01169981 | 0.02150924 | 0.22846738 | 0.56952076 | 0.00992989    | 0.24953829 | 0.83470117   | 0.56327225 | 0.96663195 | 0.68188272 | 1               | 1   |

| IL-1F5          | Control    |            | IL-17C     |            | IL-6       |            | TNF        |            | IL-17C + IL-6 |             | IL-17C + TNF |            | IL-6 + TNF |            | IL-17C+IL-6+TNF |     |
|-----------------|------------|------------|------------|------------|------------|------------|------------|------------|---------------|-------------|--------------|------------|------------|------------|-----------------|-----|
|                 | 24h        | 48h        | 24h        | 48h        | 24h        | 48h        | 24h        | 48h        | 24h           | 48h         | 24h          | 48h        | 24h        | 48h        | 24h             | 48h |
| Control         | 1          | 1          |            |            |            |            |            |            |               |             |              |            |            |            |                 |     |
| IL-17C          | 0.80573104 | 0.04373081 | 1          | 1          |            |            |            |            |               |             |              |            |            |            |                 |     |
| IL-6            | 0.93461361 | 0.23190144 | 0.75092203 | 0.68708101 | 1          | 1          |            |            |               |             |              |            |            |            |                 |     |
| TNF             | 0.00010529 | 0.00076541 | 0.00011507 | 0.00129443 | 0.00010883 | 0.00120332 | 1          | 1          |               |             |              |            |            |            |                 |     |
| IL-17C + IL-6   | 0.81524614 | 0.0997055  | 0.95149224 | 0.46112541 | 0.75276806 | 0.36329226 | 8.8868E-05 | 0.00249945 | 1             | 1           |              |            |            |            |                 |     |
| IL-17C + TNF    | 1.7764E-07 | 7.4783E-06 | 1.7127E-07 | 1.0731E-05 | 2.1697E-07 | 1.0527E-05 | 0.13208094 | 0.02002573 | 8.06E-08      | 1.938E-05   | 1            | 1          |            |            |                 |     |
| IL-6 + TNF      | 4.0854E-05 | 0.0001129  | 4.3875E-05 | 0.00015976 | 4.5892E-05 | 0.00015227 | 0.23038293 | 0.0729683  | 2.458E-05     | 0.00024886  | 0.00264475   | 0.70274116 | 1          | 1          |                 |     |
| IL-17C+IL-6+TNF | 1.5375E-05 | 0.00045112 | 1.6142E-05 | 0.0006779  | 1.7659E-05 | 0.00063716 | 0.37417494 | 0.34241574 | 8.5384E-06    | 0.000110976 | 0.00522501   | 0.17013243 | 0.64152974 | 0.36219074 | 1               | 1   |

| IL-1F8          | Control    |            | IL-17C     |            | IL-6       |            | TNF        |            | IL-17C + IL-6 |            | IL-17C + TNF |            | IL-6 + TNF |            | IL-17C+IL-6+TNF |     |
|-----------------|------------|------------|------------|------------|------------|------------|------------|------------|---------------|------------|--------------|------------|------------|------------|-----------------|-----|
|                 | 24h        | 48h        | 24h        | 48h        | 24h        | 48h        | 24h        | 48h        | 24h           | 48h        | 24h          | 48h        | 24h        | 48h        | 24h             | 48h |
| Control         | 1          | 1          |            |            |            |            |            |            |               |            |              |            |            |            |                 |     |
| IL-17C          | 0.78217943 | 0.17958187 | 1          | 1          |            |            |            |            |               |            |              |            |            |            |                 |     |
| IL-6            | 0.35824178 | 0.05269938 | 0.42892572 | 0.33334484 | 1          | 1          |            |            |               |            |              |            |            |            |                 |     |
| TNF             | 0.00011003 | 0.01904847 | 0.00011381 | 0.02150018 | 0.00016591 | 0.02458985 | 1          | 1          |               |            |              |            |            |            |                 |     |
| IL-17C + IL-6   | 0.67837321 | 0.09392553 | 0.8159112  | 0.29658893 | 0.61738864 | 0.72692473 | 0.00013187 | 0.02674146 | 1             | 1          |              |            |            |            |                 |     |
| IL-17C + TNF    | 0.00129307 | 0.01273959 | 0.00134779 | 0.01470305 | 0.00183483 | 0.01724887 | 0.67105632 | 0.86473222 | 0.00150032    | 0.01912003 | 1            | 1          |            |            |                 |     |
| IL-6 + TNF      | 0.00016342 | 0.00435611 | 0.00016857 | 0.00490077 | 0.00021897 | 0.00559102 | 0.33863233 | 0.55134967 | 0.00018532    | 0.00609258 | 0.22165771   | 0.42042291 | 1          | 1          |                 |     |
| IL-17C+IL-6+TNF | 1.4592E-05 | 0.01784575 | 1.4929E-05 | 0.01908193 | 2.2738E-05 | 0.02054716 | 0.59658651 | 0.29371706 | 1.7856E-05    | 0.02147134 | 0.36990038   | 0.23515939 | 0.56489619 | 0.51014709 | 1               | 1   |

| IL-1F9          | Control    |            | IL-17C     |            | IL-6       |            | TNF        |            | IL-17C + IL-6 |            | IL-17C + TNF |            | IL-6 + TNF |            | IL-17C+IL-6+TNF |     |
|-----------------|------------|------------|------------|------------|------------|------------|------------|------------|---------------|------------|--------------|------------|------------|------------|-----------------|-----|
|                 | 24h        | 48h        | 24h        | 48h        | 24h        | 48h        | 24h        | 48h        | 24h           | 48h        | 24h          | 48h        | 24h        | 48h        | 24h             | 48h |
| Control         | 1          | 1          |            |            |            |            |            |            |               |            |              |            |            |            |                 |     |
| IL-17C          | 0.00207235 | 0.00460862 | 1          | 1          |            |            |            |            |               |            |              |            |            |            |                 |     |
| IL-6            | 0.02593677 | 0.56349457 | 0.07497716 | 0.01116469 | 1          | 1          |            |            |               |            |              |            |            |            |                 |     |
| TNF             | 3.1579E-06 | 0.00328845 | 3.7978E-05 | 0.00876289 | 9.0985E-06 | 0.00365467 | 1          | 1          |               |            |              |            |            |            |                 |     |
| IL-17C + IL-6   | 2.5477E-06 | 0.05617052 | 0.91613539 | 0.43687555 | 0.00933145 | 0.0726124  | 1.9047E-05 | 0.02285636 | 1             | 1          |              |            |            |            |                 |     |
| IL-17C + TNF    | 8.0808E-06 | 0.00014582 | 2.8825E-05 | 0.00029241 | 1.4066E-05 | 0.00015712 | 0.01539901 | 0.06599347 | 2.2993E-05    | 0.00066669 | 1            | 1          |            |            |                 |     |
| IL-6 + TNF      | 1.3639E-05 | 0.00018507 | 8.6752E-05 | 0.00067659 | 3.033E-05  | 0.00021276 | 0.37323751 | 0.93981084 | 5.9709E-05    | 0.00377893 | 0.07787918   | 0.04647144 | 1          | 1          |                 |     |
| IL-17C+IL-6+TNF | 7.885E-05  | 1.3038E-10 | 0.0002328  | 2.1751E-08 | 0.00012729 | 2.8751E-10 | 0.03726778 | 0.66672791 | 0.00020464    | 0.00021584 | 0.94069624   | 0.01203352 | 0.12130703 | 0.45232312 | 1               | 1   |

| CXCL1           | Control    |            | IL-17C     |            | IL-6       |            | TNF        |            | IL-17C + IL-6 |            | IL-17C + TNF |            | IL-6 + TNF |     | IL-17C+IL-6+TNF |     |
|-----------------|------------|------------|------------|------------|------------|------------|------------|------------|---------------|------------|--------------|------------|------------|-----|-----------------|-----|
|                 | 24h        | 48h        | 24h        | 48h        | 24h        | 48h        | 24h        | 48h        | 24h           | 48h        | 24h          | 48h        | 24h        | 48h | 24h             | 48h |
| Control         | 1          | 1          |            |            |            |            |            |            |               |            |              |            |            |     |                 |     |
| IL-17C          | 0.05102011 | 0.5380899  | 1          | 1          |            |            |            |            |               |            |              |            |            |     |                 |     |
| IL-6            | 6.0452E-07 | 0.13494861 | 6.9776E-05 | 0.30823464 | 1          | 1          |            |            |               |            |              |            |            |     |                 |     |
| TNF             | 0.00174257 | 0.14536979 | 0.00243089 | 0.15246346 | 0.00732234 | 0.17147774 | 1          | 1          |               |            |              |            |            |     |                 |     |
| IL-17C + IL-6   | 6.5865E-05 | 0.10561646 | 0.00061703 | 0.16051664 | 0.28621127 | 0.38834226 | 0.01069958 | 0.21039766 | 1             | 1          |              |            |            |     |                 |     |
| IL-17C + TNF    | 0.00598526 | 0.02524172 | 0.00736665 | 0.03017769 | 0.01470766 | 0.04688505 | 0.45505863 | 0.49277096 | 0.01829054    | 0.10774088 | 1            | 1          |            |     |                 |     |
| IL-6 + TNF      | 0.00764487 | 0.01486722 | 0.00885916 | 0.01707952 | 0.0145     | 0.02413508 | 0.19663083 | 0.72125421 | 0.01686803    | 0.04748497 | 0.49881429   | 0.50657144 | 1          | 1   |                 |     |
| IL-17C+IL-6+TNF | 0.010455   | 0.01527983 | 0.01180683 | 0.01924871 | 0.01773334 | 0.03403332 | 0.15167375 | 0.43283484 | 0.02005297    |            |              |            |            |     |                 |     |

| DefB4a          | Control    |            | IL-17C     |            | IL-6       |            | TNF        |            | IL-17C + IL-6 |            | IL-17C + TNF |            | IL-6 + TNF |            | IL-17C+IL-6+TNF |     |
|-----------------|------------|------------|------------|------------|------------|------------|------------|------------|---------------|------------|--------------|------------|------------|------------|-----------------|-----|
|                 | 24h        | 48h        | 24h        | 48h        | 24h        | 48h        | 24h        | 48h        | 24h           | 48h        | 24h          | 48h        | 24h        | 48h        | 24h             | 48h |
| Control         | 1          | 1          |            |            |            |            |            |            |               |            |              |            |            |            |                 |     |
| IL-17C          | 0.01397318 | 0.00143326 | 1          | 1          |            |            |            |            |               |            |              |            |            |            |                 |     |
| IL-6            | 0.00235755 | 0.0002675  | 0.12486418 | 0.00635042 | 1          | 1          |            |            |               |            |              |            |            |            |                 |     |
| TNF             | 0.00181668 | 0.00143497 | 0.00406447 | 0.00302021 | 0.0084621  | 0.01548581 | 1          | 1          |               |            |              |            |            |            |                 |     |
| IL-17C + IL-6   | 0.00081858 | 0.01329545 | 0.00247808 | 0.01739339 | 0.00700164 | 0.03016732 | 0.51743661 | 0.1875576  | 1             | 1          |              |            |            |            |                 |     |
| IL-17C + TNF    | 1.3827E-06 | 0.00215679 | 2.5597E-06 | 0.00273359 | 4.7818E-06 | 0.00448794 | 0.00981873 | 0.02846877 | 0.00106477    | 0.36891173 | 1            | 1          |            |            |                 |     |
| IL-6 + TNF      | 4.0591E-05 | 0.00013849 | 7.1228E-05 | 0.00019074 | 0.00012146 | 0.00038391 | 0.03796893 | 0.00764319 | 0.0077755     | 0.41359127 | 0.72381657   | 0.78893168 | 1          | 1          |                 |     |
| IL-17C+IL-6+TNF | 3.9825E-06 | 0.00016903 | 5.057E-06  | 0.00021199 | 6.2962E-06 | 0.00034391 | 8.1221E-05 | 0.00253887 | 3.5092E-05    | 0.09277979 | 0.00076225   | 0.4240667  | 0.00081729 | 0.21727247 | 1               | 1   |

| S100A8          | Control    |            | IL-17C     |            | IL-6       |            | TNF        |            | IL-17C + IL-6 |            | IL-17C + TNF |            | IL-6 + TNF |            | IL-17C+IL-6+TNF |     |
|-----------------|------------|------------|------------|------------|------------|------------|------------|------------|---------------|------------|--------------|------------|------------|------------|-----------------|-----|
|                 | 24h        | 48h        | 24h        | 48h        | 24h        | 48h        | 24h        | 48h        | 24h           | 48h        | 24h          | 48h        | 24h        | 48h        | 24h             | 48h |
| Control         | 1          | 1          |            |            |            |            |            |            |               |            |              |            |            |            |                 |     |
| IL-17C          | 0.08927914 | 4.1721E-05 | 1          | 1          |            |            |            |            |               |            |              |            |            |            |                 |     |
| IL-6            | 7.1738E-05 | 0.00018307 | 0.00079182 | 0.00106847 | 1          | 1          |            |            |               |            |              |            |            |            |                 |     |
| TNF             | 0.00012139 | 2.9095E-05 | 0.00071779 | 0.00011086 | 0.38984317 | 0.13697122 | 1          | 1          |               |            |              |            |            |            |                 |     |
| IL-17C + IL-6   | 3.2625E-06 | 0.0023206  | 2.446E-05  | 0.00563026 | 0.04356839 | 0.21769232 | 0.3034373  | 0.77082612 | 1             | 1          |              |            |            |            |                 |     |
| IL-17C + TNF    | 1.5946E-05 | 4.6014E-05 | 5.8434E-05 | 0.00011738 | 0.01135788 | 0.01745054 | 0.06340639 | 0.16139407 | 0.21710247    | 0.42722786 | 1            | 1          |            |            |                 |     |
| IL-6 + TNF      | 2.8728E-08 | 0.00049315 | 1.4133E-07 | 0.00093422 | 3.4105E-05 | 0.01796688 | 0.00042169 | 0.07707234 | 0.00086227    | 0.17473523 | 0.04401997   | 0.38788757 | 1          | 1          |                 |     |
| IL-17C+IL-6+TNF | 2.5285E-08 | 0.00076442 | 1.1982E-07 | 0.0014265  | 2.524E-05  | 0.02405582 | 0.00030103 | 0.09547162 | 0.00057703    | 0.19892429 | 0.0300437    | 0.42829863 | 0.77075655 | 0.97151353 | 1               | 1   |

| S100A9        | Control    |            | IL-17C     |            | IL-6       |            | TNF        |            | IL-17C + IL-6 |            | IL-17C + TNF |            | IL-6 + TNF |     | IL-17C+IL-6+TNF |     |
|---------------|------------|------------|------------|------------|------------|------------|------------|------------|---------------|------------|--------------|------------|------------|-----|-----------------|-----|
|               | 24h        | 48h        | 24h        | 48h        | 24h        | 48h        | 24h        | 48h        | 24h           | 48h        | 24h          | 48h        | 24h        | 48h | 24h             | 48h |
| Control       | 1          | 1          |            |            |            |            |            |            |               |            |              |            |            |     |                 |     |
| IL-17C        | 0.20367018 | 0.01558752 | 1          | 1          |            |            |            |            |               |            |              |            |            |     |                 |     |
| IL-6          | 0.0033167  | 0.00035768 | 0.00812101 | 0.00085257 | 1          | 1          |            |            |               |            |              |            |            |     |                 |     |
| TNF           | 0.00047936 | 1.0103E-06 | 0.00133814 | 3.0329E-06 | 0.666053   | 0.41255549 | 1          | 1          |               |            |              |            |            |     |                 |     |
| IL-17C + IL-6 | 9.0464E-06 | 6.2777E-05 | 2.6787E-05 | 0.00013691 | 0.08593508 | 0.37425718 | 0.14873209 | 0.78752851 | 1             | 1          |              |            |            |     |                 |     |
| IL-17C + TNF  | 0.00025119 | 2.8337E-08 | 0.00044815 | 6.517E-08  | 0.05155588 | 0.0048498  | 0.07971371 | 0.0036146  | 0.39783267    | 0.03291515 | 1            | 1          |            |     |                 |     |
| IL-6 + TNF    | 2.4684E-07 | 4.5191E-05 | 5.1027E-07 | 6.6919E-05 | 0.00031958 | 0.00604146 | 0.00034555 | 0.00883893 | 0.0020018     | 0.01771422 | 0.06214993   | 0.15094206 | 1          | 1   |                 |     |

Figure S5

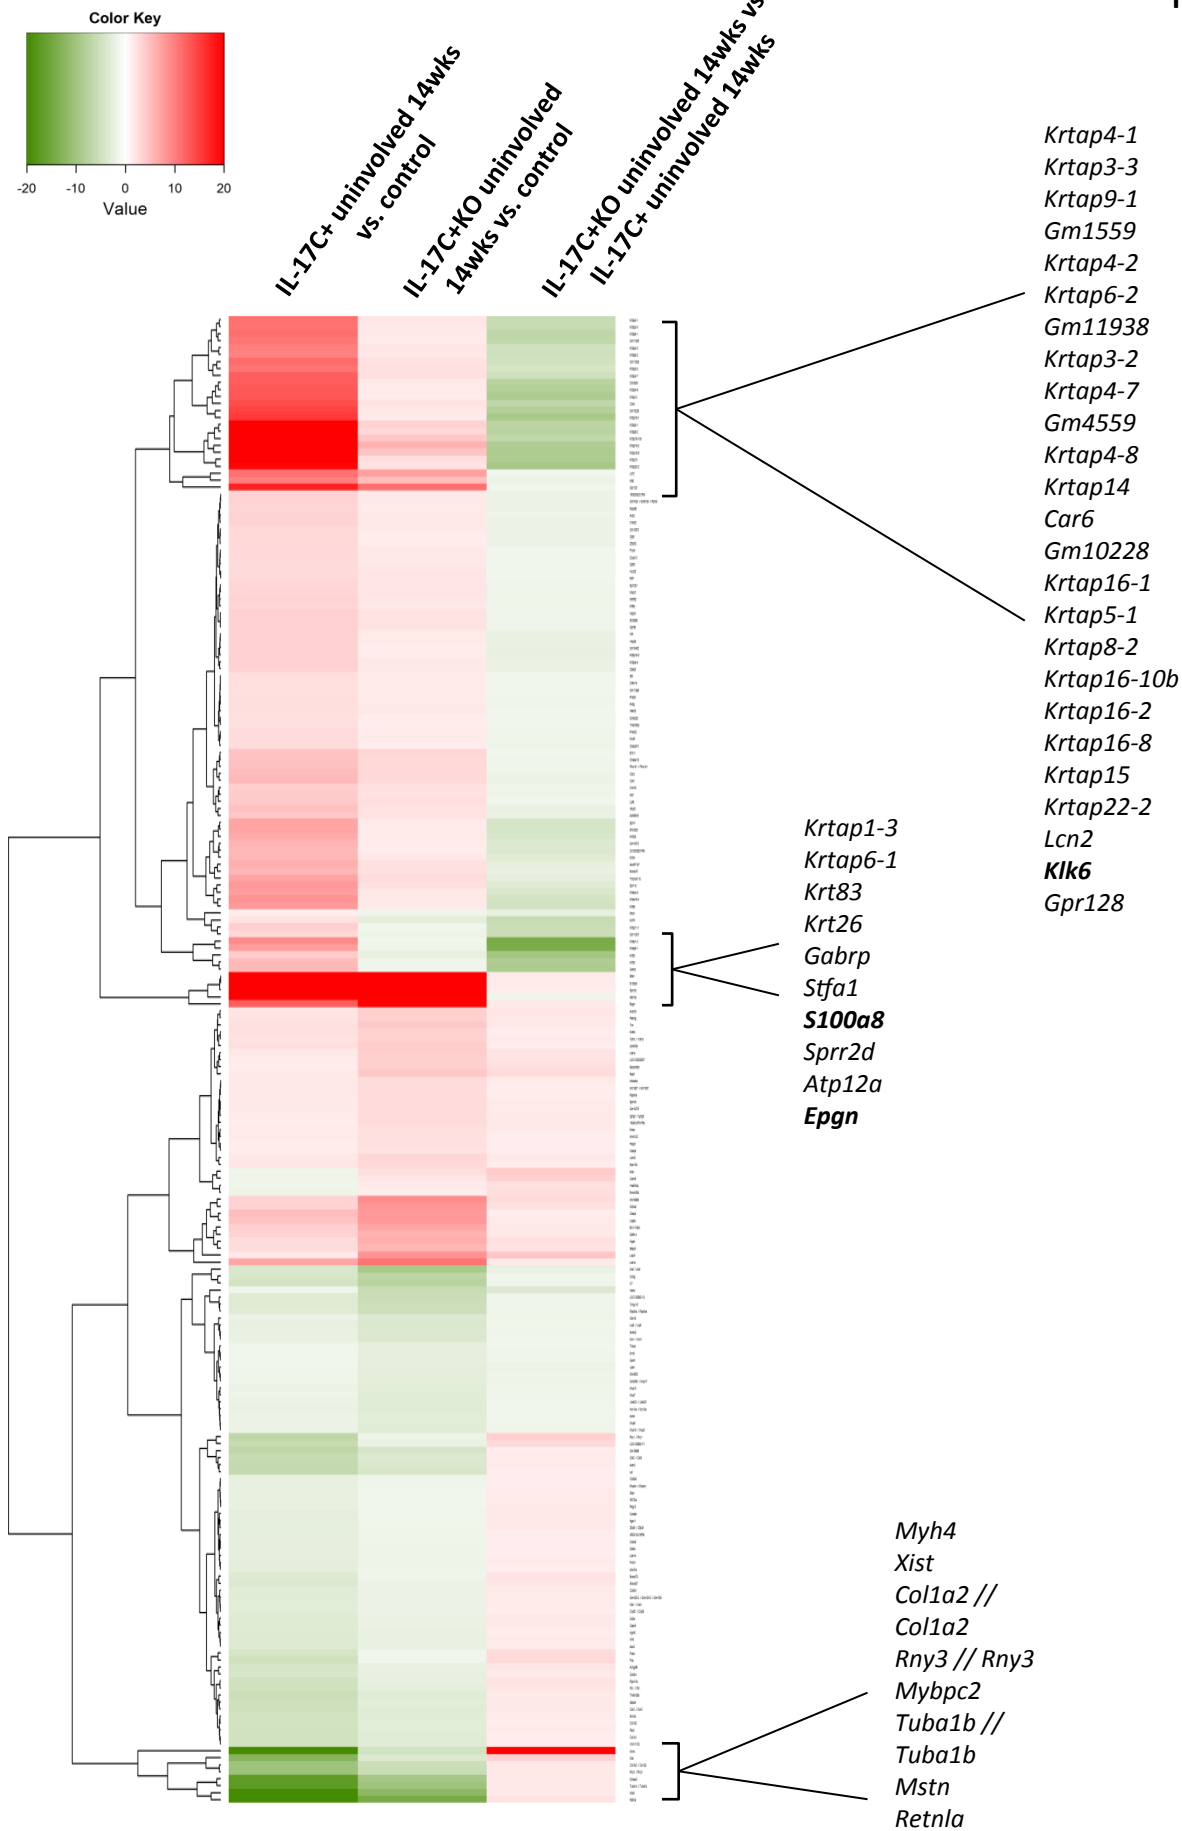

Figure S6

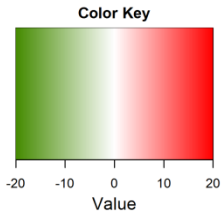

IL-17C+KO uninvolved 10wks  
vs. control

IL-17C+KO uninvolved 14wks  
vs. control

IL-17C+KO uninvolved 14wks vs.  
IL-17C+KO uninvolved 10wks

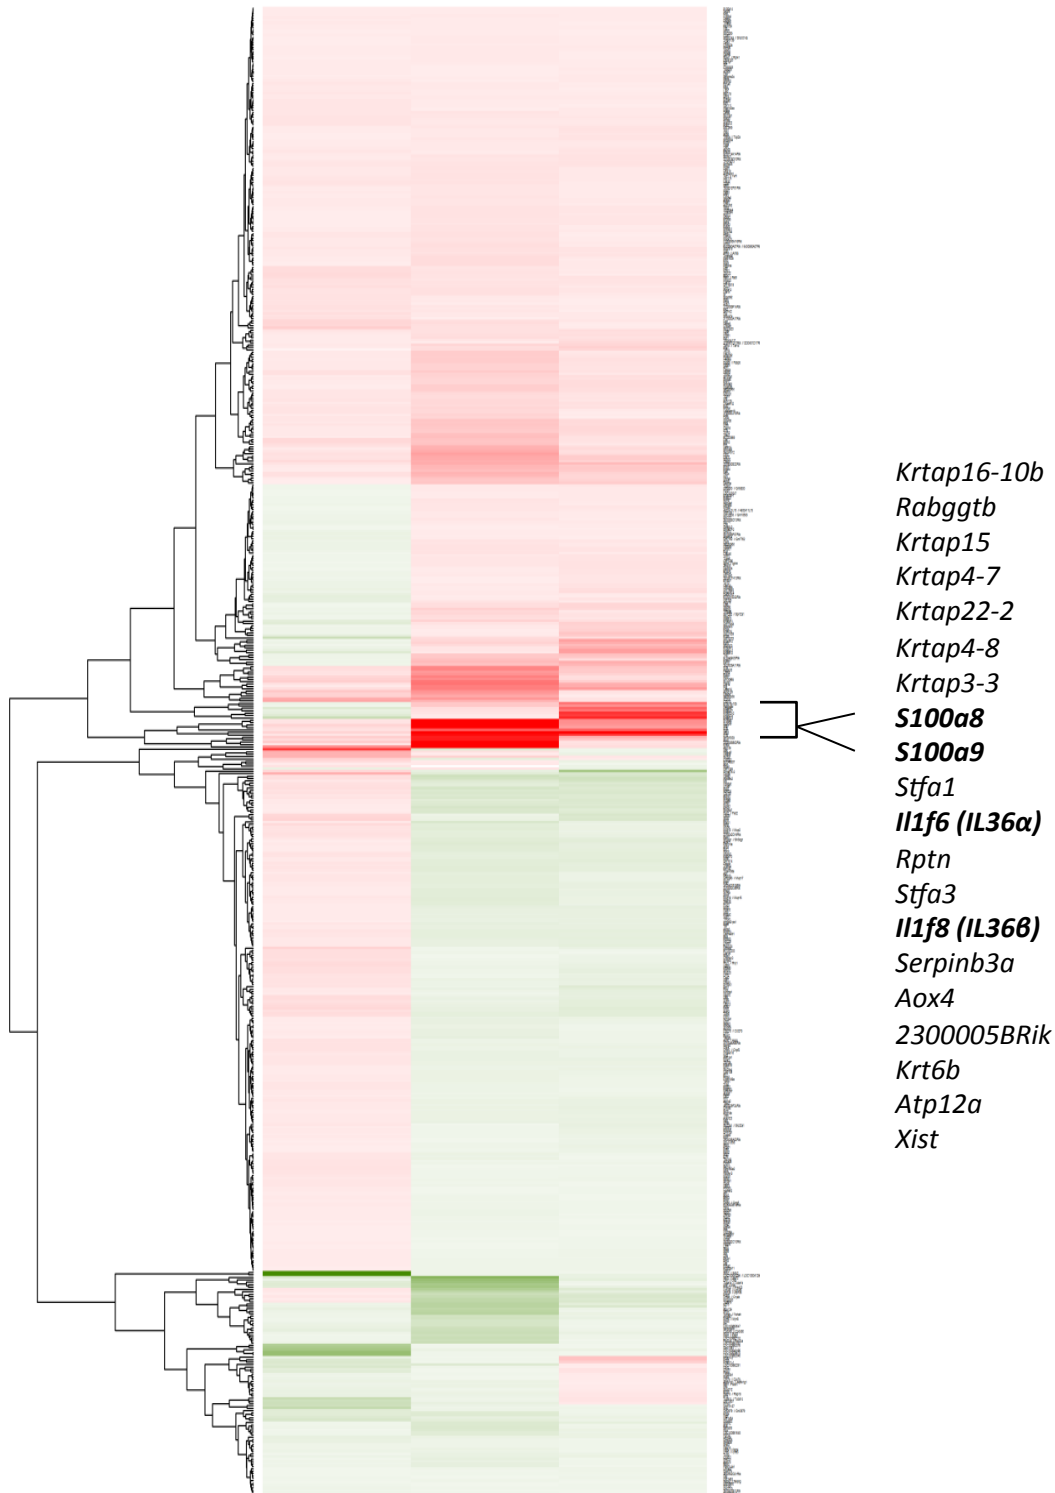

Figure S7

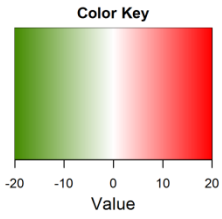

IL-17C+ involved 14wks vs. control  
IL-17C+KO involved 14wks vs. control  
IL-17C+ involved 14wks vs. IL-17C+KO involved 14wks

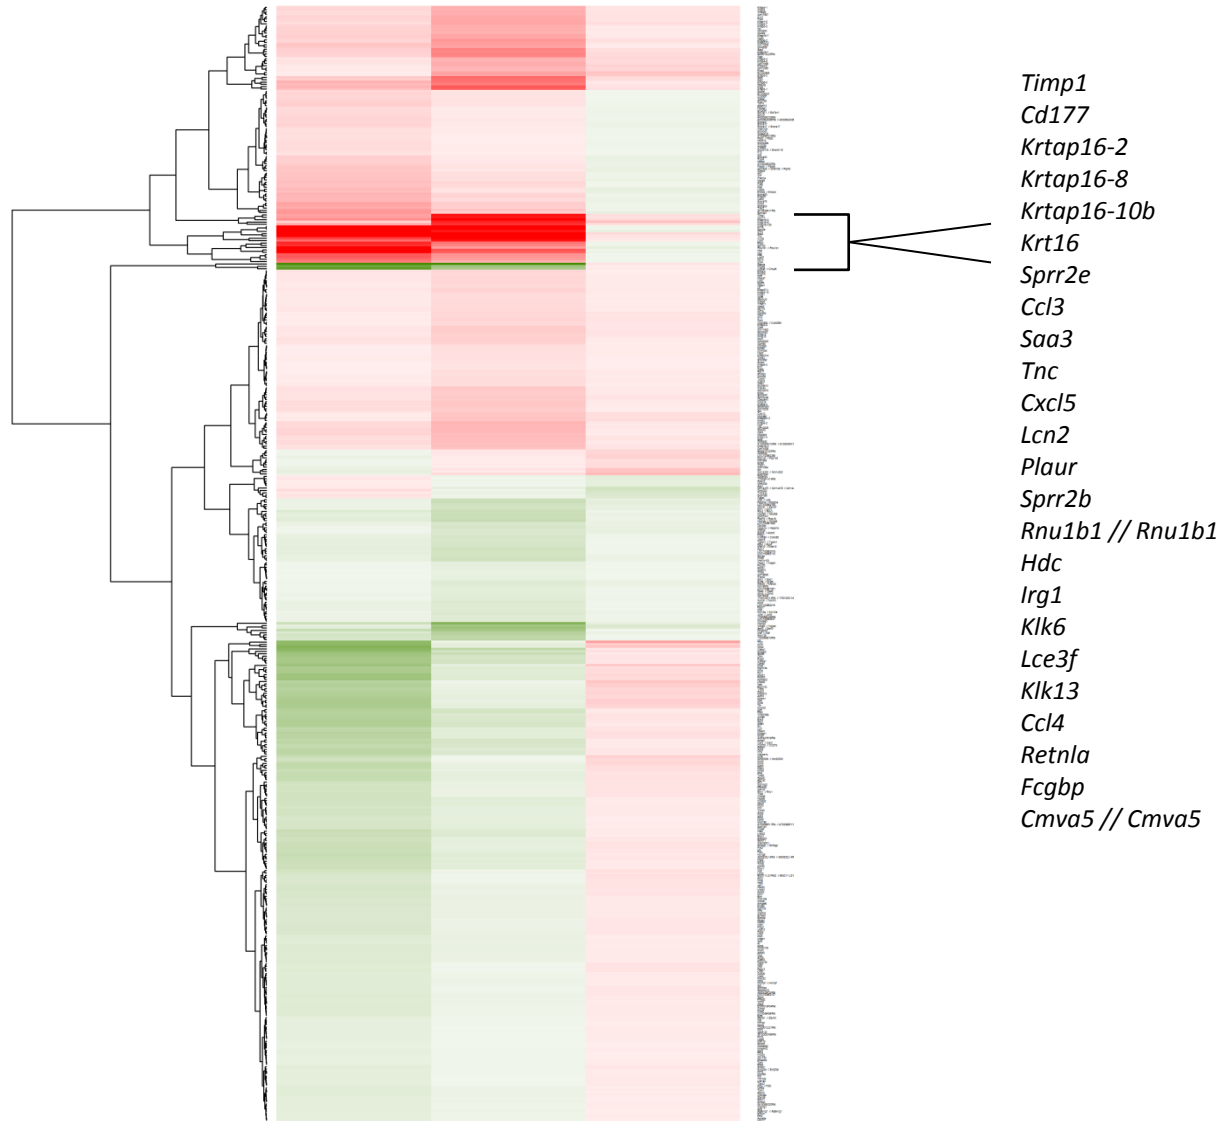

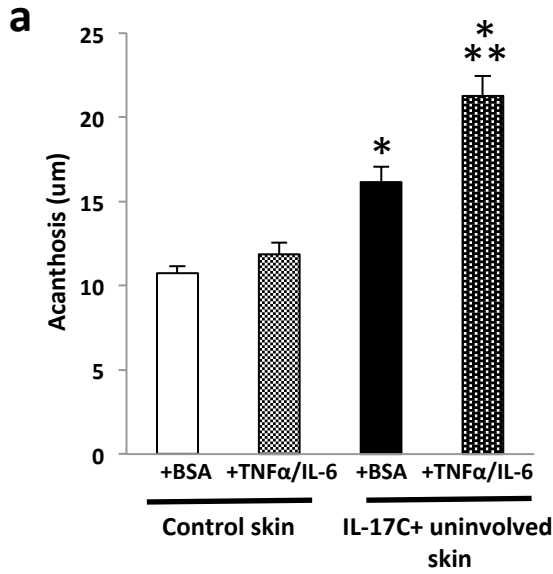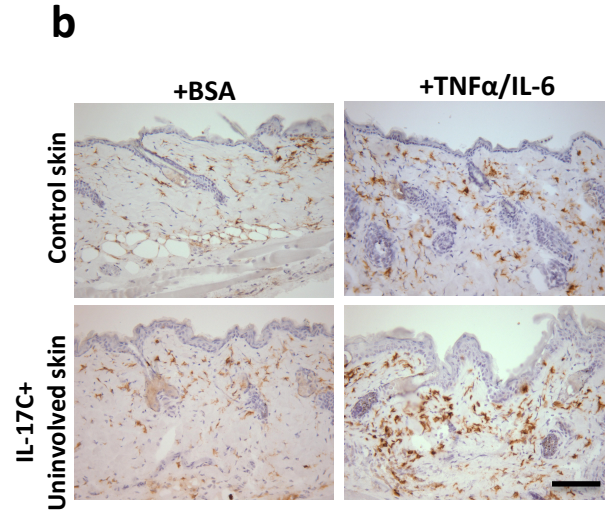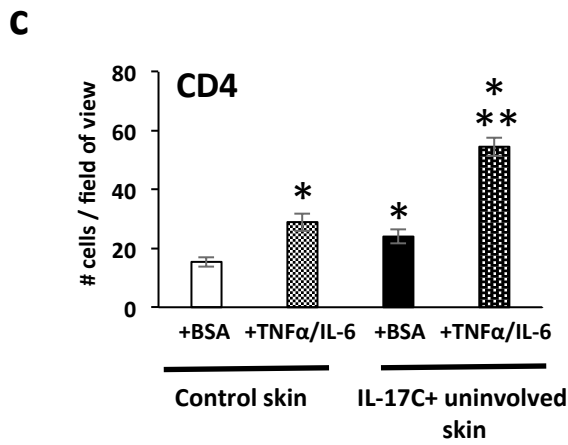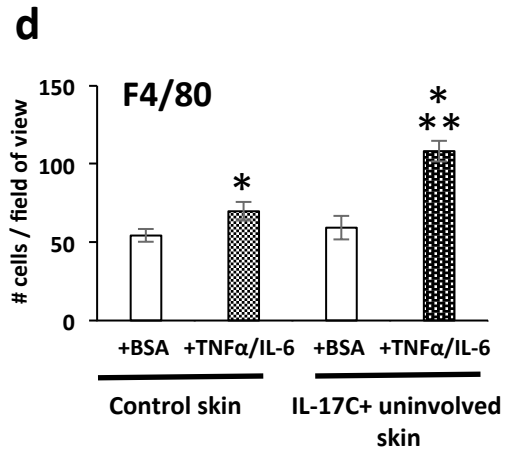

Supplement: NIHMS837405-supplement.pdf [file NIHMS837405-supplement.pdf]
